# Supplementary material for: Efficacy of Salmonella Bacteriophage S1 Delivered and Released by Alginate Beads in a Chicken Model of Infection
Source: MDPI journal article supplement (doi:10.3390/v13101932), 2021-09-25
Supplement: s1 [file s1]

# Supplementary Materials:

**Table S1.** Bacterial strains used in the present study.

| Bacterium                          | Identification of bacterial |
|------------------------------------|-----------------------------|
| <i>S. Enteritidis</i> (SE PT13A)   | Host strain                 |
| <i>S. Typhi</i> (ST-PH1)           | ICTH                        |
| <i>S. Pullorum</i> (MDR-MC862-A)   | ICTP                        |
| <i>S. Gallinarum</i> (MDR-MC862-B) | ICTP                        |
| <i>S. Cholerasuis</i> (SC-PH1)     | ICTH                        |
| <i>C. freundii</i> (CF-PH1)        | ICTH                        |
| <i>E. cloacae</i> (EC-PT1)         | ICTH                        |
| <i>E. coli</i> (EC-PT1)            | ICTH                        |

ICTP: Isolated from clinical trials in poultry, ICTH: Isolated from clinical trials in humans

**Table S2.** Percentage of infectives bacteriophages post-exposure gastric conditions of poultry.

| Anatomical portion simulated of<br><i>Gallus gallus domesticus</i> | pH 3 / 45 min               | pH 5 / 15 min | pH 7 / 30 min   | pH 8.5 / 20 min |
|--------------------------------------------------------------------|-----------------------------|---------------|-----------------|-----------------|
|                                                                    | Proventriculus +<br>gizzard | Duodenum      | Jejunum e ileum | Cecum           |
| Non encapsulated bacteriophages*                                   | 38.23*                      | 79.78*        | 96.37*          | 89.65*          |
| Encapsulated bacteriophages**                                      | 14.95**                     | 26.52**       | 46.30**         | 37.19**         |

\* Percentage of infectivity of phage S1 non encapsulated; \*\* Percentage relative of phage S1 release from initial titer.
